# Supplementary material for: A Collision Cross Section Database for Extractables and Leachables from Food Contact Materials
Source: PubMed Central journal article supplement (PMC9011387; doi:10.1021/acs.jafc.2c00724), 2022-04-05
Supplement: jf2c00724_si_001.pdf [file jf2c00724_si_001.pdf]

## Supporting Information

### A Collision Cross Section (CCS) Database for Extractables and Leachables from Food Contact Materials

Xue-Chao Song<sup>1</sup>, Elena Canellas<sup>1</sup>, Nicola Dreolin<sup>2</sup>, Jeff Goshawk<sup>2</sup>, Cristina Nerin<sup>1,\*</sup>

1. Department of Analytical Chemistry, Aragon Institute of Engineering Research I3A, CPS-University of Zaragoza, Maria de Luna 3, 50018, Zaragoza, Spain.

2. Waters Corporation, Altrincham Road, SK9 4AX, Wilmslow, United Kingdom.

\* Corresponding author: Cristina Nerin, Phone: +34 976761873, Email: [cnerin@unizar.es](mailto:cnerin@unizar.es).

## Table of Contents:

**Experimental Section:** UPLC-IMS-QToF conditions.

**Experimental Section:** CCS Calibration of Vion IMS-QToF.

**Table S1.** Calibration substances in Major Mix IMS/Tof Calibration Kit and their CCS values in positive mode.

**Table S2.** Calibration substances in Major Mix IMS/Tof Calibration Kit and their CCS values in negative mode.

**Table S3.** Molecular formula, monoisotopic mass, retention time (RT) and  $^{DT}CCS_{N_2}$  of nine compounds in quality control (QC) solution.

**Table S4.** Thirty-eight compounds for validating the inter-day precision of CCS measurements.

**Table S5.** Comparison between reference and experimental CCS values for QC compounds for all batches of standards.

**Table S6.** The regression equations of different types of plasticizers, antioxidant, photoinitiators and oligomers.

**Table S7.** The CCS records with deviations higher than 5% with literature values.

**Figure S1.** CCS deviations of quality control (QC) compounds for all batches of standards, (A) positive ion mode and (B) negative ion mode.

**Figure S2.** Typical structures of benzophenone, thioxanthone and anthraquinone.

**Figure S3.** CCS values vs  $m/z$  values for flame retardants, lubricants and slip agents.

**Figure S4.** Inter-day precision of CCS measurement over two months.

**Figure S5.** Arrival time distribution (ATD) of ciprofloxacin.

**Figure S6.** Several CCS values of triclosan ( $[M-H]^-$ ;  $m/z$  286.9438) arising from post-IMS dissociation of noncovalent clusters.

## Experimental Section

**UPLC-IMS-QToF conditions.** The chromatographic separation was performed using a CORTECS C18 column ( $2.1 \times 100$  mm,  $1.6 \mu\text{m}$  particle size,  $90 \text{ \AA}$  pore size) at a flow rate of  $0.3 \text{ mL min}^{-1}$ . Mobile phases were water (A) and methanol (B), both acidified with 0.1% of formic acid (v/v). The initial proportion of B was 5%, increased to 100% over 7 minutes, kept at 100% from 7 to 11 minutes, decreased to 5% over 0.1 minutes and re-conditioned until 13 minutes.

Data were acquired on the mass spectrometer in both positive and negative ion modes over the mass range of 50-1200  $m/z$  with a scan time of 0.2 s. Electrospray ionization (ESI) conditions were as follows: capillary voltage, 1 kV; cone voltage, 30 V; source temperature,  $120 \text{ }^\circ\text{C}$ ; desolvation temperature,  $500 \text{ }^\circ\text{C}$ ; cone gas flow,  $50 \text{ L h}^{-1}$ ; desolvation gas flow,  $800 \text{ L h}^{-1}$ . Data were acquired in high definition  $\text{MS}^E$  mode, with the instrument was switching between two collision energy states (low energy: 6 eV, high energy ramp: 20-40 eV) in order to obtain precursor and fragment ions within a single acquisition. Leucine-Enkephalin ( $[\text{M}+\text{H}]^+$ ,  $m/z$  556.2766 and  $[\text{M}-\text{H}]^-$ ,  $m/z$  554.2620) at a concentration of  $100 \text{ ng/mL}$  was infused at a rate of  $15 \mu\text{L/min}$  for real-time mass correction. IM separations were performed with a travelling wave velocity of  $250 \text{ m/s}$  and IMS pulse height of 45 V,  $\text{N}_2$  was used as the drift gas at a flow of  $25 \text{ mL/min}$ . The Vion platform works at a room temperature of  $25 \text{ }^\circ\text{C}$ .

**CCS Calibration of Vion IMS-QToF.** In Vion platform, the CCS calibration was performed automatically in UNIFI software. The calibration process was described by the following functions, firstly, the normalized CCS  $\Omega_n$  was calculated from the reference CCS values  $\Omega$  of the calibrates (the reference CCS values of calibrates are detected by drift tube ion mobility spectrometry (DTIMS) using a step-field method):

$$\Omega_n = \Omega \times \frac{\sqrt{\mu}}{z}$$

where  $\mu = \frac{m_{ion} \times m_{gas}}{m_{ion} + m_{gas}}$ ,  $m_{ion}$  and  $m_{gas}$  are the mass of each calibrate and drift gas ( $\text{N}_2$ ), respectively. Then the arrival time (or drift time)  $t_A$  of the calibrates were recorded and the corrected arrival time  $t_d$  was calculated:

$$t_d = t_A - c \sqrt{\frac{m}{z}}$$

where  $c = \frac{EDC}{1000}$ ,  $EDC$  is the enhanced duty cycle (EDC) delay coefficient of the instrument. After this, the normalized CCS  $\Omega_n$  versus  $t_d$  are fitted using an empirically-derived power-law function:

$$\Omega_n = A(t_d - t_0)^B$$

$t_0$  is the undetermined time off-set, the coefficient  $A$  and exponential factor  $B$  are calculated, which will be used for the derivation of CCS of unknown compounds. This function was then used to calculate the CCS values of calibrates and compared with their reference CCS, the acceptance criteria of the calibration is that CCS deviation of each calibrate is within  $\pm 2\%$ .

More information about CCS calibration approach can be seen in Righetti et al. (2020)<sup>1</sup> and Bush et al. (2010).<sup>2</sup>

Table S1. Calibration substances in Major Mix IMS/Tof Calibration Kit and their CCS values in positive mode.

| Compound           | Formula                                                                                       | m/z [M+H] <sup>+</sup> | CCS (Å <sup>2</sup> ) |
|--------------------|-----------------------------------------------------------------------------------------------|------------------------|-----------------------|
| Acetaminophen      | C <sub>8</sub> H <sub>9</sub> NO <sub>2</sub>                                                 | 152.0706               | 130.4                 |
| Reserpine fragment | C <sub>8</sub> H <sub>10</sub> N <sub>4</sub> O <sub>2</sub>                                  | 195.0877               | 138.2                 |
| Sulfaguanidine     | C <sub>7</sub> H <sub>10</sub> N <sub>4</sub> O <sub>2</sub> S                                | 215.0597               | 146.8                 |
| Sulfadimethoxine   | C <sub>12</sub> H <sub>14</sub> N <sub>4</sub> O <sub>4</sub> S                               | 311.0809               | 168.4                 |
| Val-Tyr-Val        | C <sub>19</sub> H <sub>29</sub> N <sub>3</sub> O <sub>5</sub>                                 | 380.2180               | 191.7                 |
| Verapamil          | C <sub>27</sub> H <sub>38</sub> N <sub>2</sub> O <sub>4</sub>                                 | 455.2904               | 208.8                 |
| Terfenadine        | C <sub>32</sub> H <sub>41</sub> NO <sub>2</sub>                                               | 472.3210               | 228.7                 |
| Polyalanine, n=7   | C <sub>21</sub> H <sub>37</sub> N <sub>7</sub> O <sub>8</sub>                                 | 516.2776               | 211.0                 |
| Leucine Enkephalin | C <sub>28</sub> H <sub>37</sub> N <sub>5</sub> O <sub>7</sub>                                 | 556.2766               | 229.8                 |
| Polyalanine, n=8   | C <sub>24</sub> H <sub>42</sub> N <sub>8</sub> O <sub>9</sub>                                 | 587.3148               | 228.0                 |
| Reserpine          | C <sub>33</sub> H <sub>40</sub> N <sub>2</sub> O <sub>9</sub>                                 | 609.2807               | 252.3                 |
| Polyalanine, n=9   | C <sub>27</sub> H <sub>47</sub> N <sub>9</sub> O <sub>10</sub>                                | 658.3519               | 243.0                 |
| Polyalanine, n=10  | C <sub>30</sub> H <sub>52</sub> N <sub>10</sub> O <sub>11</sub>                               | 729.3890               | 256.0                 |
| Polyalanine, n=11  | C <sub>33</sub> H <sub>57</sub> N <sub>11</sub> O <sub>12</sub>                               | 800.4261               | 271.0                 |
| Polyalanine, n=12  | C <sub>36</sub> H <sub>62</sub> N <sub>12</sub> O <sub>13</sub>                               | 871.4632               | 282.0                 |
| Polyalanine, n=13  | C <sub>39</sub> H <sub>67</sub> N <sub>13</sub> O <sub>14</sub>                               | 942.5003               | 294.0                 |
| Polyalanine, n=14  | C <sub>42</sub> H <sub>72</sub> N <sub>14</sub> O <sub>15</sub>                               | 1013.5374              | 306.0                 |
| Polyalanine, n=15  | C <sub>45</sub> H <sub>77</sub> N <sub>15</sub> O <sub>16</sub>                               | 1084.5746              | 321.5                 |
| Polyalanine, n=16  | C <sub>48</sub> H <sub>82</sub> N <sub>16</sub> O <sub>17</sub>                               | 1155.6117              | 333.6                 |
| Ultramark 1621     | C <sub>20</sub> H <sub>18</sub> O <sub>6</sub> N <sub>3</sub> P <sub>3</sub> F <sub>2</sub> S | 1022.0034              | 263.1                 |
| Ultramark 1621     | C <sub>22</sub> H <sub>18</sub> O <sub>6</sub> N <sub>3</sub> P <sub>3</sub> F <sub>3</sub> S | 1121.9970              | 276.5                 |

Table S2. Calibration substances in Major Mix IMS/Tof Calibration Kit and their CCS values in negative mode.

| Compound                                 | Formula                                                                                      | m/z [M-H] <sup>-</sup> | CCS (Å <sup>2</sup> ) |
|------------------------------------------|----------------------------------------------------------------------------------------------|------------------------|-----------------------|
| Acetaminophen                            | C <sub>8</sub> H <sub>9</sub> NO <sub>2</sub>                                                | 150.0561               | 131.5                 |
| Theophylline                             | C <sub>7</sub> H <sub>7</sub> N <sub>4</sub> O <sub>2</sub>                                  | 179.0575               | 132.4                 |
| Sulfaguanidine                           | C <sub>7</sub> H <sub>10</sub> N <sub>4</sub> O <sub>2</sub> S                               | 213.0452               | 145.2                 |
| Sulfadimethoxine                         | C <sub>12</sub> H <sub>14</sub> N <sub>4</sub> O <sub>4</sub> S                              | 309.0663               | 170.1                 |
| Val-Tyr-Val                              | C <sub>19</sub> H <sub>29</sub> N <sub>3</sub> O <sub>5</sub>                                | 378.2034               | 192.5                 |
| Leucine Enkephalin                       | C <sub>28</sub> H <sub>37</sub> N <sub>5</sub> O <sub>7</sub>                                | 554.2620               | 225.3                 |
| Perfluoroheptanoic acid -CO <sub>2</sub> | C <sub>6</sub> F <sub>13</sub>                                                               | 318.9798               | 130.1                 |
| Perfluorooctanoic acid -CO <sub>2</sub>  | C <sub>7</sub> F <sub>15</sub>                                                               | 368.9766               | 137.2                 |
| Polyalanine, n=8                         | C <sub>24</sub> H <sub>42</sub> N <sub>8</sub> O <sub>9</sub>                                | 585.3002               | 227.7                 |
| Reserpine                                | C <sub>33</sub> H <sub>40</sub> N <sub>2</sub> O <sub>9</sub>                                | 607.2661               | 265.2                 |
| Polyalanine, n=9                         | C <sub>27</sub> H <sub>47</sub> N <sub>9</sub> O <sub>10</sub>                               | 656.3373               | 242.1                 |
| Polyalanine, n=10                        | C <sub>30</sub> H <sub>52</sub> N <sub>10</sub> O <sub>11</sub>                              | 727.3744               | 255.9                 |
| Polyalanine, n=11                        | C <sub>33</sub> H <sub>57</sub> N <sub>11</sub> O <sub>12</sub>                              | 798.4115               | 268.5                 |
| Polyalanine, n=12                        | C <sub>36</sub> H <sub>62</sub> N <sub>12</sub> O <sub>13</sub>                              | 869.4487               | 280.2                 |
| Polyalanine, n=13                        | C <sub>39</sub> H <sub>67</sub> N <sub>13</sub> O <sub>14</sub>                              | 940.4858               | 294.6                 |
| Polyalanine, n=14                        | C <sub>42</sub> H <sub>72</sub> N <sub>14</sub> O <sub>15</sub>                              | 1011.5228              | 308.8                 |
| Polyalanine, n=15                        | C <sub>45</sub> H <sub>77</sub> N <sub>15</sub> O <sub>16</sub>                              | 1082.5600              | 322.4                 |
| Ultramark 1621                           | C <sub>23</sub> H <sub>20</sub> O <sub>8</sub> N <sub>3</sub> P <sub>3</sub> F <sub>32</sub> | 1165.9880              | 275.8                 |

Table S3. Molecular formula, monoisotopic mass, retention time (RT) and <sup>DT</sup>CCS<sub>N<sub>2</sub> of nine compounds in quality control (QC) solution.</sub>

| Compound           | Molecular formula                                               | Monoisotopic mass (Da) | RT (min) | CCS (Å <sup>2</sup> ) |                    |
|--------------------|-----------------------------------------------------------------|------------------------|----------|-----------------------|--------------------|
|                    |                                                                 |                        |          | [M+H] <sup>+</sup>    | [M-H] <sup>-</sup> |
| Acetaminophen      | C <sub>8</sub> H <sub>9</sub> NO <sub>2</sub>                   | 151.0633               | 1.96     | 130.4                 | 131.5              |
| Caffeine           | C <sub>8</sub> H <sub>10</sub> N <sub>4</sub> O <sub>2</sub>    | 194.0804               | 2.76     | 138.2                 | -                  |
| Sulfaguanidine     | C <sub>7</sub> H <sub>10</sub> N <sub>4</sub> O <sub>2</sub> S  | 214.0524               | 1.02     | 146.8                 | 145.2              |
| Sulfadimethoxine   | C <sub>12</sub> H <sub>14</sub> N <sub>4</sub> O <sub>4</sub> S | 310.0736               | 3.83     | 168.4                 | 170.1              |
| Val-tyr-val        | C <sub>19</sub> H <sub>29</sub> N <sub>3</sub> O <sub>5</sub>   | 379.2107               | 2.87     | 191.7                 | 192.5              |
| Verapamil          | C <sub>27</sub> H <sub>38</sub> N <sub>2</sub> O <sub>4</sub>   | 454.2832               | 4.57     | 208.8                 | -                  |
| Terfenadine        | C <sub>32</sub> H <sub>41</sub> NO <sub>2</sub>                 | 471.3137               | 5.64     | 228.7                 | -                  |
| Leucine-enkephalin | C <sub>28</sub> H <sub>37</sub> N <sub>5</sub> O <sub>7</sub>   | 555.2693               | 3.97     | 229.8                 | 225.3              |
| Reserpine          | C <sub>33</sub> H <sub>40</sub> N <sub>2</sub> O <sub>9</sub>   | 608.2734               | 4.92     | 252.3                 | 265.2              |

Table S4. Thirty-eight compounds for validating the inter-day precision of CCS measurement.

| No. | Compounds                                                          | PubChem CID | ESI (+) | ESI (-) |
|-----|--------------------------------------------------------------------|-------------|---------|---------|
| 1   | Stearic acid                                                       | 5281        |         | •       |
| 2   | Antioxidant 425                                                    | 6928        | •       | •       |
| 3   | N-(4-Hydroxyphenyl)Stearamide                                      | 7689        | •       | •       |
| 4   | Antioxidant 2246                                                   | 8398        | •       | •       |
| 5   | 4-Hydroxybenzophenone                                              | 14347       | •       | •       |
| 6   | 11-Aminoundecanoic acid                                            | 17083       | •       | •       |
| 7   | Irganox 1024                                                       | 61916       | •       | •       |
| 8   | Irganox 1035                                                       | 64883       | •       | •       |
| 9   | 12-Aminododecanoic acid                                            | 69661       | •       | •       |
| 10  | MOPS                                                               | 70807       | •       | •       |
| 11  | Tioxolone                                                          | 72139       | •       | •       |
| 12  | 3,5-Di-tert-butyl-4-hydroxybenzaldehyde                            | 73219       | •       | •       |
| 13  | 3-(3,5-Di-tert-butyl-4-hydroxyphenyl)propionic acid                | 88389       | •       | •       |
| 14  | Antioxidant 1790                                                   | 93221       | •       | •       |
| 15  | UV-234                                                             | 112412      | •       | •       |
| 16  | Ethyl 2-cyano-3,3-diphenylacrylate                                 | 243274      | •       |         |
| 17  | 3,5-Di-tert-butyl-4-hydroxyacetophenone                            | 616296      | •       | •       |
| 18  | Bisphenol A bis(3-chloro-2-hydroxypropyl) ether                    | 3479589     | •       | •       |
| 19  | Bisphenol F bis(2,3-dihydroxypropyl) ether                         | 3928015     | •       | •       |
| 20  | Bisphenol A (3-chloro-2-hydroxypropyl) (2,3-dihydroxypropyl) Ether | 4166922     | •       | •       |
| 21  | 2,2'-Dihydroxy-4-methoxybenzophenone                               | 8569        | •       | •       |
| 22  | Erucamide                                                          | 5365371     | •       |         |
| 23  | Dibutyl phosphate                                                  | 7881        | •       | •       |
| 24  | Methylparaben                                                      | 7456        |         | •       |
| 25  | Propylparaben                                                      | 7175        |         | •       |
| 26  | Diethyl phthalate                                                  | 6781        | •       |         |
| 27  | Tinuvin P                                                          | 17113       | •       |         |
| 28  | Dibutyl sebacate                                                   | 7986        | •       |         |
| 29  | Diphenyl phthalate                                                 | 6778        | •       |         |
| 30  | Tinuvin 327                                                        | 77470       | •       | •       |
| 31  | Tri(p-cresyl) phosphate                                            | 6529        | •       |         |
| 32  | Uvitex OB                                                          | 292429      | •       |         |
| 33  | Cyasorb 2908                                                       | 94623       | •       | •       |
| 34  | Irganox 1076                                                       | 16386       | •       | •       |
| 35  | Irganox 245                                                        | 91620       | •       | •       |
| 36  | Irganox 1098                                                       | 90004       | •       | •       |
| 37  | Tinuvin 360                                                        | 3571576     | •       | •       |
| 38  | Irganox 1330                                                       | 74370       | •       | •       |

Table S5. Comparison between reference and experimental CCS values for QC compounds for all batches of standards.

|                      | Compounds          | Adducts            | m/z      | CCS <sub>ref</sub><br>(Å <sup>2</sup> ) | CCS <sub>exp</sub> ± SD<br>(Å <sup>2</sup> ) | RSD<br>(%) | error (%) |
|----------------------|--------------------|--------------------|----------|-----------------------------------------|----------------------------------------------|------------|-----------|
| Positive<br>(n = 76) | Acetaminophen      | [M+H] <sup>+</sup> | 152.0706 | 130.4                                   | 131.8 ± 1.1                                  | 0.8        | 1.1       |
|                      | Caffeine           | [M+H] <sup>+</sup> | 195.0877 | 138.2                                   | 137.7 ± 1.0                                  | 0.7        | -0.4      |
|                      | Sulfaguanidine     | [M+H] <sup>+</sup> | 215.0597 | 146.8                                   | 146.5 ± 0.9                                  | 0.6        | -0.2      |
|                      | Sulfadimethoxine   | [M+H] <sup>+</sup> | 311.0809 | 168.4                                   | 168.0 ± 1.0                                  | 0.6        | -0.3      |
|                      | Val-tyr-val        | [M+H] <sup>+</sup> | 380.2180 | 191.7                                   | 193.6 ± 1.0                                  | 0.5        | 1.0       |
|                      | Verapamil          | [M+H] <sup>+</sup> | 455.2904 | 208.8                                   | 210.2 ± 1.2                                  | 0.6        | 0.7       |
|                      | Terfenadine        | [M+H] <sup>+</sup> | 472.3210 | 228.7                                   | 231.0 ± 1.5                                  | 0.6        | 1.0       |
|                      | Leucine-enkephalin | [M+H] <sup>+</sup> | 556.2766 | 229.8                                   | 228.9 ± 1.3                                  | 0.6        | -0.4      |
|                      | Reserpine          | [M+H] <sup>+</sup> | 609.2807 | 252.3                                   | 252.3 ± 1.6                                  | 0.6        | -0.0      |
| Negative<br>(n = 24) | Acetaminophen      | [M-H] <sup>-</sup> | 150.0561 | 131.5                                   | 130.2 ± 0.9                                  | 0.7        | -1.0      |
|                      | Sulfaguanidine     | [M-H] <sup>-</sup> | 213.0452 | 145.2                                   | 144.1 ± 0.9                                  | 0.7        | -0.8      |
|                      | Sulfadimethoxine   | [M-H] <sup>-</sup> | 309.0663 | 170.1                                   | 170.4 ± 1.1                                  | 0.6        | 0.2       |
|                      | Val-tyr-val        | [M-H] <sup>-</sup> | 378.2034 | 192.5                                   | 194.1 ± 1.2                                  | 0.6        | 0.9       |
|                      | Leucine-enkephalin | [M-H] <sup>-</sup> | 554.2620 | 225.3                                   | 223.5 ± 1.6                                  | 0.7        | -0.8      |
|                      | Reserpine          | [M-H] <sup>-</sup> | 607.2661 | 265.2                                   | 267.9 ± 1.5                                  | 0.5        | 1.0       |

Table S6. The regression equations of different types of plasticizers, antioxidant, photoinitiators and oligomers.

| Additives       | Types                  | Number of CCS | Equations                      | R <sup>2</sup> |
|-----------------|------------------------|---------------|--------------------------------|----------------|
| Plasticizers    | Phthalates             | 30            | y = 5.6996x <sup>0.6041</sup>  | 0.9610         |
|                 | Adipates and sebacates | 10            | y = 6.0367x <sup>0.5975</sup>  | 0.9652         |
|                 | Citrates               | 5             | y = 6.5292x <sup>0.5732</sup>  | 0.8924         |
|                 | Others                 | 12            | y = 6.6809x <sup>0.5745</sup>  | 0.9837         |
| Antioxidants    | Phenolics              | 34            | y = 13.2458x <sup>0.4601</sup> | 0.9363         |
|                 | Phosphites             | 6             | y = 8.5852x <sup>0.5358</sup>  | 0.9299         |
|                 | Degradation products   | 23            | y = 18.5045x <sup>0.3994</sup> | 0.6752         |
|                 | Others                 | 4             | y = 6.4174x <sup>0.5878</sup>  | 0.9820         |
| Photoinitiators | Benzophenones          | 15            | y = 4.8925x <sup>0.6317</sup>  | 0.9191         |
|                 | Amine co-initiators    | 4             | y = 5.7303x <sup>0.6154</sup>  | 0.9780         |
|                 | Phosphine oxides       | 4             | y = 50.3439x <sup>0.2289</sup> | 0.0754         |
|                 | Thioxanthenes          | 4             | y = 4.0913x <sup>0.6512</sup>  | 0.7309         |
|                 | Anthraquinones         | 6             | y = 23.7164x <sup>0.3320</sup> | 0.9372         |

|           |                    |    |                         |        |
|-----------|--------------------|----|-------------------------|--------|
| Oligomers | Adhesive oligomers | 7  | $y = 10.1334x^{0.4889}$ | 0.9785 |
|           | PA                 | 16 | $y = 96.013 + 0.244x$   | 0.9933 |
|           | PLA                | 42 | $y = 7.5203x^{0.5306}$  | 0.9749 |
|           | PEG and PPG        | 65 | $y = 92.801 + 0.2296x$  | 0.9843 |

y represents CCS values; x represents  $m/z$  of ions.

Table S7. The CCS records with deviations higher than 5% with literature values.

| No. | Name                  | Adducts             | PubChem<br>CID | CCS in our<br>database ( $\text{\AA}^2$ ) | CCS<br>in<br>literature ( $\text{\AA}^2$ ) | Deviations<br>(%) |
|-----|-----------------------|---------------------|----------------|-------------------------------------------|--------------------------------------------|-------------------|
| 1   | Ferulic acid          | [M+H] <sup>+</sup>  | 445858         | 141.07                                    | 128.8 <sup>3</sup>                         | -8.7              |
| 2   | Ciprofloxacin         | [M+H] <sup>+</sup>  | 2764           | 184.76                                    | 173.3 <sup>3</sup>                         | -6.2              |
| 3   | Glycocholic acid      | [M+H] <sup>+</sup>  | 10140          | 190.82                                    | 200.4 <sup>4</sup>                         | 5.02              |
| 4   | Dexamethasone         | [M+H] <sup>+</sup>  | 5743           | 183.45                                    | 192.8 <sup>5</sup>                         | 5.10              |
| 5   | Theobromine           | [M+H] <sup>+</sup>  | 5429           | 130.54                                    | 138.3 <sup>6</sup>                         | 5.94              |
| 6   | Glycocholic acid      | [M+H] <sup>+</sup>  | 10140          | 190.82                                    | 205.2 <sup>3</sup>                         | 7.54              |
| 7   | Chenodeoxycholic acid | [M+Na] <sup>+</sup> | 10133          | 196.88                                    | 219.3 <sup>5</sup>                         | 11.39             |
| 8   | p-Coumaric acid       | [M-H] <sup>-</sup>  | 637542         | 129.92                                    | 119.8 <sup>7</sup>                         | -7.79             |
| 9   | Dehydrocholic acid    | [M-H] <sup>-</sup>  | 6674           | 208.37                                    | 192.4 <sup>8</sup>                         | -7.66             |
| 10  | Arbutin               | [M-H] <sup>-</sup>  | 440936         | 172.99                                    | 160.81 <sup>6</sup>                        | -7.04             |
| 11  | (+)-Lactose           | [M-H] <sup>-</sup>  | 6134           | 176.62                                    | 166.7 <sup>9</sup>                         | -5.62             |
| 12  | (+)-Lactose           | [M-H] <sup>-</sup>  | 6134           | 176.62                                    | 167.0 <sup>5</sup>                         | -5.45             |
| 13  | D-(+)-Trehalose       | [M-H] <sup>-</sup>  | 7427           | 175.09                                    | 166.0 <sup>5</sup>                         | -5.19             |
| 14  | Lithocholic acid      | [M-H] <sup>-</sup>  | 9903           | 209.67                                    | 198.9 <sup>8</sup>                         | -5.14             |
| 15  | Stearic acid          | [M-H] <sup>-</sup>  | 5281           | 183.84                                    | 174.42 <sup>9</sup>                        | -5.12             |
| 16  | Hyodeoxycholic acid   | [M-H] <sup>-</sup>  | 5283820        | 209.77                                    | 199.2 <sup>8</sup>                         | -5.04             |
| 17  | Ellagic acid          | [M-H] <sup>-</sup>  | 5281855        | 149.78                                    | 157.9 <sup>7</sup>                         | 5.42              |



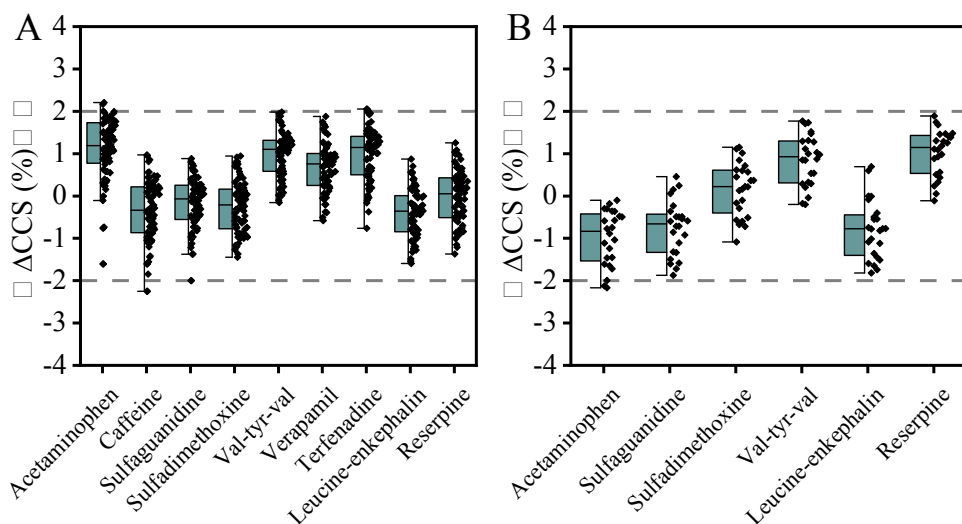

Figure S1. CCS deviations of quality control (QC) compounds for all batches of standards, (A) positive ion mode and (B) negative ion mode.

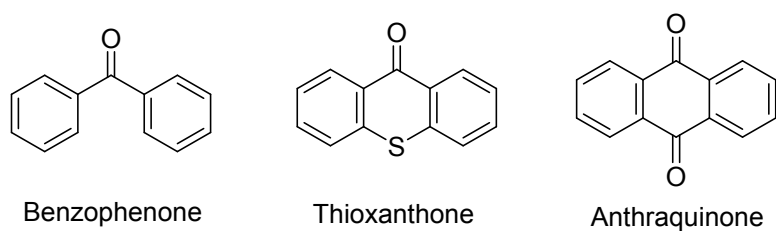

Figure S2. Typical structures of benzophenone, thioxanthone and anthraquinone.

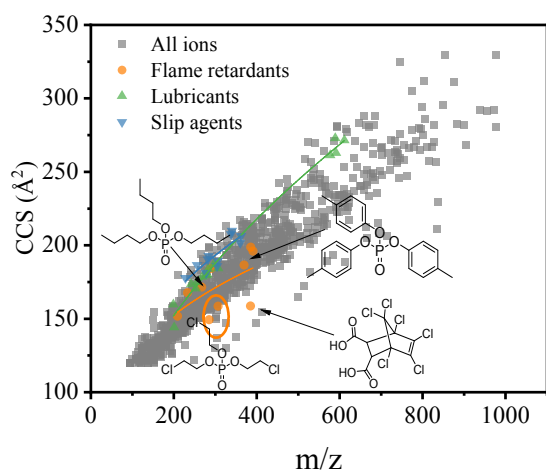

Figure S3. CCS values vs  $m/z$  values for flame retardants, lubricants and slip agents.

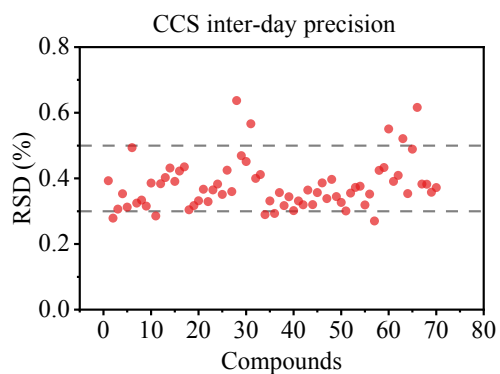

Figure S4. Inter-day precision of CCS measurement over two months.

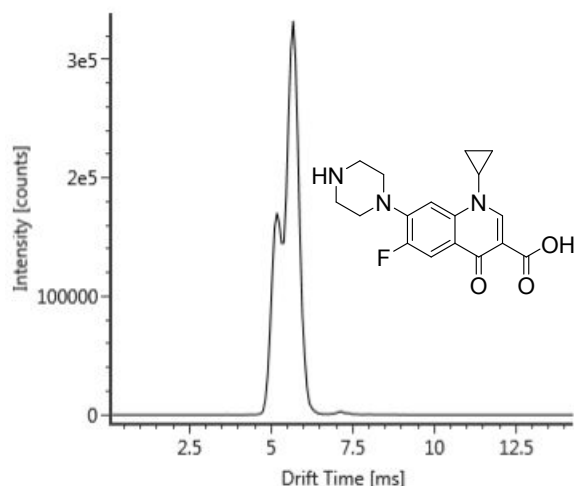

Figure S5. Arrival time distribution (ATD) of ciprofloxacin.

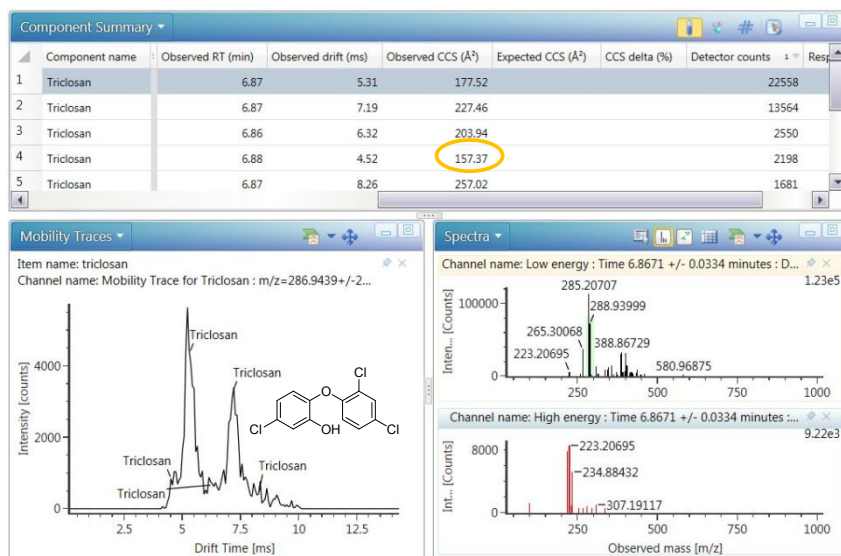

Figure S6. Several CCS values of triclosan ([M-H]<sup>-</sup>, m/z 286.9438) arising from post-IMS

dissociation of noncovalent clusters.

## References

1. Righetti, L.; Dreolin, N.; Celma, A.; McCullagh, M.; Barknowitz, G.; Sancho, J. V.; Dall'Asta, C., Travelling Wave Ion Mobility-Derived Collision Cross Section for Mycotoxins: Investigating Interlaboratory and Interplatform Reproducibility. *J. Agric. Food Chem.* 2020, 68, (39), 10937-10943.
2. Bush, M. F.; Hall, Z.; Giles, K.; Hoyes, J.; Robinson, C. V.; Ruotolo, B. T., Collision cross sections of proteins and their complexes: a calibration framework and database for gas-phase structural biology. *Anal. Chem.* 2010, 82, (22), 9557-9565.
3. Hines, K. M.; Ross, D. H.; Davidson, K. L.; Bush, M. F.; Xu, L., Large-Scale Structural Characterization of Drug and Drug-Like Compounds by High-Throughput Ion Mobility-Mass Spectrometry. *Anal. Chem.* 2017, 89, (17), 9023-9030.
4. Nichols, C. M.; Dodds, J. N.; Rose, B. S.; Picache, J. A.; Morris, C. B.; Codreanu, S. G.; May, J. C.; Sherrod, S. D.; McLean, J. A., Untargeted Molecular Discovery in Primary Metabolism: Collision Cross Section as a Molecular Descriptor in Ion Mobility-Mass Spectrometry. *Anal. Chem.* 2018, 90, (24), 14484-14492.
5. Waters Corporation, Metabolic Profiling CCS Library. URL <https://marketplace.waters.com/apps/177290/metabolic-profiling-ccs-library#!overview>. (accessed 10 March 2022).
6. Waters Corporation, Natural Products Profiling CCS Library. URL <https://marketplace.waters.com/apps/255816/naturalproducts-profiling-ccs-library#!overview>. (accessed 10 March 2022).
7. Gonzales, G. B.; Smaghe, G.; Coelus, S.; Adriaenssens, D.; De Winter, K.; Desmet, T.; Raes, K.; Van Camp, J., Collision cross section prediction of deprotonated phenolics in a travelling-wave ion mobility spectrometer using molecular descriptors and chemometrics. *Anal. Chim. Acta* 2016, 924, 68-76.
8. Poland, J. C.; Leaptrot, K. L.; Sherrod, S. D.; Flynn, C. R.; McLean, J. A., Collision Cross Section Conformational Analyses of Bile Acids via Ion Mobility-Mass Spectrometry. *J. Am. Soc. Mass Spectrom.* 2020, 31, (8), 1625-1631.
9. Zhou, Z.; Shen, X.; Tu, J.; Zhu, Z. J., Large-Scale Prediction of Collision Cross-Section Values for Metabolites in Ion Mobility-Mass Spectrometry. *Anal. Chem.* 2016, 88, (22), 11084-11091.
